# Supplementary material for: A Genetically Engineered Bivalent Vaccine Coexpressing a Molecular Adjuvant against Classical Swine Fever and Porcine Epidemic Diarrhea
Source: MDPI journal article supplement (doi:10.3390/ijms241511954), 2023-07-26
Supplement: s1 [file s1]

## Supplementary materials

### 1. Construction of eukaryotic expression plasmids for self-cleavage analysis of C-strain $N^{\text{pro}}$ and its mutant $N^{\text{pro}}_{\text{D136N}}$

To analyze the effect of the residue 136<sup>th</sup> mutation (D136N) located in  $N^{\text{pro}}$  on autoprotease activity, we constructed  $pN^{\text{pro}}$ -CoreEGFP,  $pN^{\text{pro}}_{\text{D136N}}$ -CoreEGFP and  $pN^{\text{pro}}_{\text{D136N}}$ CARD-CoreEGFP, respectively. Briefly, the fragment consisted of  $N^{\text{pro}}$  gene of the C-strain ~ 1-243 nt sequence encoding partial Core ~ sequence encoding linker (GGGGSGGGGS) ~ EGFP gene was synthesized by Sangon Biotech (Shanghai, China). The synthetic fragment was digested with *Afl* II and *Not* I. After purification of digested product, the purified fragment was linked into *Afl* II/*Not* I-digested pVAX1 to generate  $pN^{\text{pro}}$ -CoreEGFP. Similarly, the fragment consisted of  $N^{\text{pro}}_{\text{D136N}}$  gene (or sequence encoding  $N^{\text{pro}}_{\text{D136N}}$ CARD) ~ 1-243 nt sequence encoding partial Core ~ encoding linker (GGGGSGGGGS) ~ EGFP gene was synthesized, respectively. After digestion and purification, the purified fragment was linked into *Afl* II/*Not* I-digested pVAX1 to generate  $pN^{\text{pro}}_{\text{D136N}}$ -CoreEGFP or  $pN^{\text{pro}}_{\text{D136N}}$ CARD-CoreEGFP (Figure S1). All constructs were sequenced to confirm the identities.

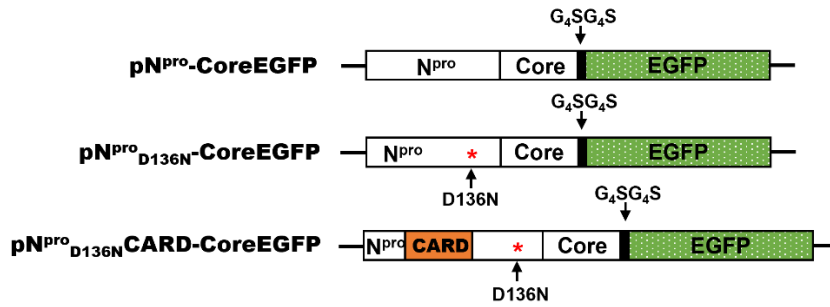

**Figure S1.** Schematics of the eukaryotic expression plasmids  $pN^{\text{pro}}$ -CoreEGFP,  $pN^{\text{pro}}_{\text{D136N}}$ -CoreEGFP and  $pN^{\text{pro}}_{\text{D136N}}$ CARD-CoreEGFP.

### 2. Construction of the infectious cDNA clone of CSFV vaccine C-strain harboring the residue 136<sup>th</sup> mutation (D136N)

To construct the infectious cDNA clone of C-strain harboring D136N mutation, the  $N^{\text{pro}}_{\text{D136N}}$  fragment ( $F_A$ ) was amplified by PCR using the plasmid pVAX1- $N^{\text{pro}}_{\text{D136N}}$ -Flag as template with specific primers C292-F/C901-R, and the fragment covering core to E2 region (nucleotides 878 to 3243) ( $F_B$ ) was amplified by PCR using pSPTI/C cDNA as template with primers C878-F/C3243-R (Table S1), respectively. After purification of the PCR products, a mixture of two fragments ( $F_A$  and  $F_B$ ) were used as templates for overlap extension PCR with specific primers C292-F/C3243-R to generate the fragment  $F_C$ . After digestion with *Pml* I and *Nsi* I, the digested-fragment  $F_C$  was cloned into *Pml* I/*Nsi* I-digested pSPTI/C/SM3'UTR cDNA to generate the cDNA clone  $pC/SM3'UTR_N$  (Figure S2). The construct was sequenced to confirm its identity.

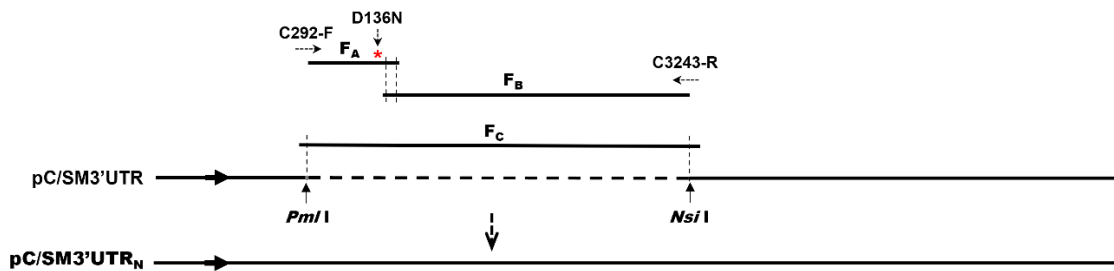

**Figure S2.** Schematics of the construction of the infectious cDNA clone of vaccine C-strain harboring the residue 136<sup>th</sup> (D136N) (Red asterisk) using restriction enzyme-digested amplified fragments.

### 3. Construction of the infectious chimeric cDNA clone of CSFV vaccine C-strain expressing foreign protein domains

The chimeric cDNA clones of vaccine C-strain expressing foreign protein domains were constructed by following steps, respectively. Briefly, the  $N^{\text{pro}}_{\text{D136N}}$  fragment ( $F_1$ ) was amplified by PCR using the plasmid pVAX1- $N^{\text{pro}}_{\text{D136N}}$ -Flag as template with specific primers C292-F/C901-R. A mixture of the purified  $F_1$  and the synthesized S1NCOE/2A fragment ( $F_2$ ) was used as template for construction of the fragment  $F_{12}$ . The core to E2 region ( $F_3$ ) were amplified by PCR using pC/SM3'UTR as template with primers 2Acore-F/C3243-R (Table S1). After purification of the PCR products, the fragment  $F_{123}$  was amplified by an overlap extension PCR using a mixture of purified  $F_{12}$  and  $F_3$  as templates with primers C292-F and C3243-R. After digestion with restrict enzymes *Pml* I and *Nsi* I, the digested- $F_{123}$  was cloned into *Pml* I/*Nsi* I-digested pC/SM3'UTR to generate the cDNA clone pC/SM3'UTR<sub>N</sub>-S1NCOE. To obtain the fragment tPAs/S1NCOE/2A ( $F_2'$ ) was amplified using the S1NCOE/2A as template by an overlapping PCR with primers tPAs-F/tPAs-R and tPAsS1N-F/2A-R (Table S1). Then, the fragment  $F_{12}'$  was amplified using a mixture of the purified  $F_1$  and  $F_2'$  as template with primers C292-F and 2A-R. The fragment  $F_{12}'3$  was amplified by PCR using a mixture of the  $F_{12}'$  and  $F_3$  as template with with primers C292-F and C3243-R. After digestion with

restrict enzymes *Pml* I and *Nsi* I, the digested-**F12'3** was cloned into *Pml* I/*Nsi* I-digested pC/SM3'UTR to generate the pC/SM3'UTR<sub>N</sub>-tPAsS1NCOE. Similarly, the N<sup>Pro</sup><sub>D136N</sub>CARD fragment (**F1'**) was amplified by PCR using the plasmid pVAX1-N<sup>Pro</sup><sub>D136N</sub>CARD-Flag as template with specific primers C292-F/C901-R, then the fragment **F1'2'** was amplified using a mixture of the purified **F1'** and **F2'** as template with primers C292-F and 2A-R. The fragment **F1'2'3** was amplified by PCR using a mixture of the **F1'2'** and **F3** as template with primers C292-F and C3243-R. The digested-F1'2'3 was cloned into *Pml* I/*Nsi* I-digested pC/SM3'UTR to obtain pC/SM3'UTR<sub>N</sub>-CARD/tPAsS1NCOE. All constructs were sequenced to confirm the identities.

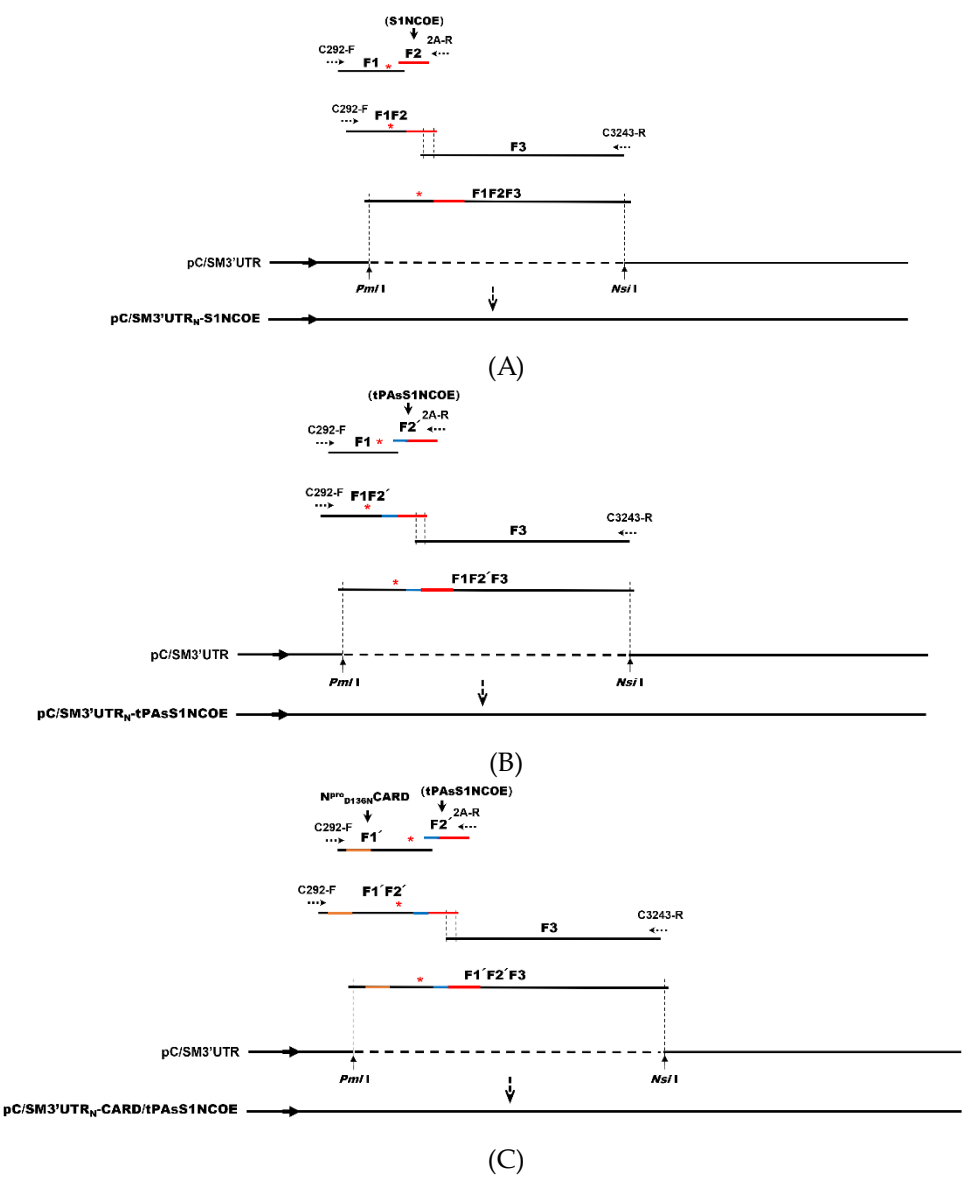

**Figure S3.** Schematics of the construction of the infectious cDNA clone chimeric C-strain using restriction enzyme-digested amplified fragments. (A) pC/SM3'UTR<sub>N</sub>-S1NCOE; (B) pC/SM3'UTR<sub>N</sub>-tPAsS1NCOE; (C) pC/SM3'UTR<sub>N</sub>-CARD/tPAsS1NCOE.

**Table S1.** Primers for construction of recombinant plasmids and infectious cDNA clones

| Primer                   | Sequence (5'-3')                                                                                                               | Description                                  |
|--------------------------|--------------------------------------------------------------------------------------------------------------------------------|----------------------------------------------|
| N <sup>pro</sup> (SM)-F  | CCGCTTAAG <sup>a</sup> ATGGAGTTGAATCATTTTGAACTTTATAC ( <i>Afl</i> II)                                                          | pVAX1-N <sup>pro</sup> -C                    |
| N <sup>pro</sup> (C)-F   | CCGCTTAAGATGGAGTTGAATCACTTTGAACTTTATAC ( <i>Afl</i> II)                                                                        |                                              |
| N <sup>pro</sup> -Flag-R | ATAAGAATGCGGCCGCCTTGTCATCGTCGTCCTTGTAATCGCA<br>ACTGGTAACCCACAATGGACAG ( <i>Not</i> I)                                          | pVAX1-N <sup>pro</sup> -SM                   |
| N <sup>pro</sup> CARD-F  | CCGCTTAAGATGGAGTTGAATCACTTTGAACTTTATACAAAA<br>CAAACATGACCTTCGCCGAA ( <i>Afl</i> II)                                            | pVAX1-N <sup>pro</sup> CARD-Flag             |
| CARD-R                   | CCCATTGGTTTTTTGTTTGCTGTTGCGCAGCAG                                                                                              |                                              |
| CARD-F                   | CTGCTGCGCAACAGCAAACAAAAACCAATGGG                                                                                               |                                              |
| N <sup>pro</sup> CARD-R  | ATAAGAATGCGGCCGCCTTGTCATCGTCGTCCTTG ( <i>Not</i> I)                                                                            | pVAX1-N <sup>pro</sup> D136N-Flag            |
| D136N-F                  | CATATGTGTGCATCAAT <sup>b</sup> GGCTGC                                                                                          |                                              |
| D136N-R                  | GCAGCCATTGATGCACACATATG                                                                                                        | pVAX1-N <sup>pro</sup> D136NCARD-Flag        |
| C292-F                   | CGCACGTGATGGGAGTACGACCTGATAGGGCGCTGCAGAGGC<br>CCACTATTAGGCTAGTATAAAAAATCTCTGCTGTACATGGCACA<br>TGGAGTTGAATCACTT ( <i>Pml</i> I) | pC/SM3'UTR <sub>N</sub>                      |
| C901-R                   | CTCCCACTCGCGCCATCATCGGAGCAACTGGTAACCCACAAT<br>GG                                                                               |                                              |
| C878-F                   | TCCGATGATGGCGCGAGTGGG                                                                                                          |                                              |
| C3243-R                  | CCAATGCATGCACCTTGACAGTCGTGTTACCGATCAAGCAC<br>( <i>Nsi</i> I)                                                                   |                                              |
| tPAs-F                   | TCCGATGATGGCGCGAGTGGGATGGATGCAATGAAG                                                                                           | pC/SM3'UTR <sub>N</sub> -S1NCOE              |
| tPAs-R                   | GCACCTGGTGACATCTGAAGAGATTTCGC                                                                                                  | pC/SM3'UTR <sub>N</sub> -tPAsS1NCOE          |
| tPAsS1N-F                | GCGAAATCTCTTCAGATGTCACCAGGTGC                                                                                                  |                                              |
| 2A-R                     | AGGCCCAAGGTTCTCCTCCACGTC                                                                                                       | pC/SM3'UTR <sub>N</sub> -<br>CARD/tPAsS1NCOE |
| 2Acore-F                 | GTGGAGGAGAACCCTGGGCCTTCGATGATGGCGCGAGTG                                                                                        |                                              |

<sup>a</sup> Corresponding restriction enzyme sites are underlined;<sup>b</sup> Mutation sites are indicated in italics.**Table S2.** Specific primers for qRT-PCR

| Primer | Sequence (5'-3')          | Description |
|--------|---------------------------|-------------|
| NS5B-F | ATCTGCCTACAAGGAAGTCATCGG  | CSFV        |
| NS5B-R | CCAGTTGCCCTCTTTAACACCCATA |             |
| N-F    | CGCAAAGACTGAACCCACTAACCT  | PEDV        |
| N-R    | TTGCCTCTGTTGTTACTTGGAGAT  |             |
